# Supplementary material for: Onecut Factors and Pou2f2 Regulate the Distribution of V2 Interneurons in the Mouse Developing Spinal Cord
Source: PubMed Central journal article supplement (PMC6561314; doi:10.3389/fncel.2019.00184), 2019-06-05
Supplement: Table_1.pdf [file Table_1.pdf]

| Gene                                                                                          | Symbol  | Fold change | pvalue    | adjpvalue |
|-----------------------------------------------------------------------------------------------|---------|-------------|-----------|-----------|
| Polyamine modulated factor 1 binding protein 1                                                | Pmfbp1  | 0.28        | 1.50E-10  | 3.80E-06  |
| Pappalysin 2                                                                                  | Pappa2  | 0.33        | 5.31E-05  | 0.134     |
| NK6 homeobox 3                                                                                | Nkx6-3  | 0.62        | 1.70E-05  | 0.072     |
| Secreted frizzled-related sequence protein 5                                                  | Sfrp5   | 0.69        | 0.002     | 0.481     |
| Synuclein, gamma                                                                              | Sncg    | 0.70        | 1.65E-04  | 0.220     |
| Sema domain, immunoglobulin domain (Ig), short basic domain, secreted, (semaphorin) 3D        | Sema3d  | 0.70        | 0.076     | 0.681     |
| NK6 homeobox 2                                                                                | Nkx6-2  | 0.70        | 1.62E-03  | 0.481     |
| Dorsal inhibitory axon guidance protein                                                       | Draxin  | 0.70        | 2.17E-03  | 0.486     |
| Stathmin-like 4                                                                               | Stmn4   | 0.71        | 1.14E-03  | 0.220     |
| Cadherin 9                                                                                    | Cdh9    | 0.71        | 0.123     | 0.732     |
| Tubulin polymerization-promoting protein family member 3                                      | Tppp3   | 0.74        | 8.53E-04  | 0.471     |
| Paired-like homeodomain transcription factor 2                                                | Pitx2   | 0.75        | 2.167E-03 | 0.486     |
| Slowmo homolog 1 (Drosophila)                                                                 | Slmo1   | 1.29        | 2.24E-03  | 0.486     |
| a disintegrin-like and metallopeptidase (reprolysin type) with thrombospondin type 1 motif, 3 | Adamts3 | 1.47        | 7.02E-04  | 0.445     |
| Cadherin 8                                                                                    | Cdh8    | 1.48        | 0.078     | 0.683     |
| POU domain, class 2, transcription factor 2                                                   | Pou2f2  | 1.57        | 5.62E-04  | 0.399     |
| Kallikrein 1-related peptidase b22                                                            | Klk1b22 | 3.20        | 1.34E-03  | 0.473     |
| Lysine (K)-specific demethylase 5D                                                            | Kdm5d   | 3.46        | 0.046     | 0.668     |

**Supplementary Table S1**
